# Supplementary material for: Preventive Effects of the Marine Microalga Phaeodactylum tricornutum, Used as a Food Supplement, on Risk Factors Associated with Metabolic Syndrome in Wistar Rats
Source: PubMed Central journal article supplement (PMC6566425; doi:10.3390/nu11051069), 2019-05-14
Supplement: nutrients-11-01069-s001.pdf [file nutrients-11-01069-s001.pdf]

## Supplementary materiel

**Table S1.** Biochemical composition of standard, high-fat diets and freeze-dried *P. tricornutum* biomass

| Nutrients (g/100g)          | CTRL  | HF    | Phaeo |      |
|-----------------------------|-------|-------|-------|------|
|                             | Data* | Data* | Mean  | SD   |
| Proteins                    | 16    | 19    | 38.90 | 0.85 |
| Carbohydrates               | 60    | 32    | 22.60 | 0.41 |
| Lipids                      | 4     | 36    | 15.80 |      |
| Mineral and vitamin mixture | 5     | 5     | -     |      |
| TDF†                        | 4     | -     | 11.17 |      |
| IDF‡                        | -     | -     | 6.29  |      |
| SDF‡                        | -     | -     | 6.06  |      |
| Humidity                    | 11    | 8     | 2.43  | 0.16 |
| Ash                         | -     | -     | 23.60 | 0.15 |

CTRL, standard diet; HF, high-fat diet; Phaeo, freeze-dried of *P. tricornutum*; IDF, insoluble dietary fiber; TDF, total dietary fiber; SDF, soluble dietary fiber; -, not analysed. For CTRL diet, the mineral mixture provides the following amounts in mg/kg of diet: C, 7300; Cl, 4000; Cu, 16; Fe, 270; K, 6000; Mg, 1600; Mn, 70; Na, 2500; P, 5500; Zn, 55. The vitamin mixture of CTRL diet provides the following amounts in mg/kg of diet: biotin, 0.04; cholin, 1600; folic acid, 0.5; niacin, 75; vitamin A, 7500; vitamin B1, 7; vitamin B2, 6.5; vitamin B5, 16.5; vitamin B6, 2.6; vitamin B12, 0.02; vitamin D3, 1000; vitamin E, 30; vitamin K3, 2.5. For HF diet the mineral mixture provides the following amounts in mg/kg of diet: Ca, 3000; Na, 4100; P, 5000. Results are represented as mean values  $\pm$  SD,  $n = 3$  for proteins, carbohydrates, humidity and ash of Phaeo biomass. \*Data of biochemical composition of control and high-fat diets have been furnished by SAFE; † Mean values ( $n = 2$ ) are shown for TDF of Phaeo biomass. ‡ Values ( $n = 1$ ) are shown for IDF and SDF of Phaeo biomass.

**Table S2.** Fatty acid composition of diets

| Fatty acid         | CTRL (mol %) |  | HF (mol %) |  | Phaeo (g/100g) |                       |
|--------------------|--------------|--|------------|--|----------------|-----------------------|
|                    | Mean         |  | Mean       |  | Mean           | SD                    |
| 4:0                | -            |  | 1.49       |  | ND             | ND                    |
| 8:0                | -            |  | 1.20       |  | ND             | ND                    |
| 10:0               | -            |  | 3.07       |  | ND             | ND                    |
| 12:0               | -            |  | 3.95       |  | ND             | ND                    |
| 14:0               | 0.63         |  | 13.16      |  | 0.64           | 0.02                  |
| 14:1               | -            |  | -          |  | 0.03           | 0.05 10 <sup>-2</sup> |
| 15:0               | -            |  | -          |  | 0.02           | 0.01 10 <sup>-1</sup> |
| 16:0               | 15.91        |  | 32.87      |  | 1.37           | 0.04                  |
| 16:1n-7            | 0.73         |  | -          |  | 1.27           | 0.06                  |
| 16:2n-6            | -            |  | -          |  | 0.09           | 0.09 10 <sup>-1</sup> |
| 16:3n-3            | -            |  | -          |  | 0.64           | 0.03                  |
| 16:3n-6            | -            |  | -          |  | 0.22           | 0.00                  |
| 16:4n-1            | -            |  | -          |  | 0.01           | 0.01 10 <sup>-1</sup> |
| 16:4n-6            | -            |  | -          |  | 0.04           | 0.00                  |
| 18:0               | 2.00         |  | 13.32      |  | 0.19           | 0.02 10 <sup>-1</sup> |
| 18:1n-7            | -            |  | -          |  | 0.20           | 0.03 10 <sup>-1</sup> |
| 18:1n-9            | 21.44        |  | 16.92      |  | 0.34           | 0.11                  |
| 18:2n-6            | 49.84        |  | 5.44       |  | 0.19           | 0.06 10 <sup>-1</sup> |
| 18:3n-3            | 4.23         |  | -          |  | 0.06           | 0.01 10 <sup>-1</sup> |
| 18:3n-6            | -            |  | -          |  | 0.04           | 0.03 10 <sup>-1</sup> |
| 18:4n-3            | 1.28         |  | -          |  | 0.05           | 0.07 10 <sup>-1</sup> |
| 20:0               | -            |  | -          |  | 0.03           | 0.03 10 <sup>-2</sup> |
| 20:2n-6            | -            |  | -          |  | 0.02           | 0.01 10 <sup>-1</sup> |
| 20:3n-3            | -            |  | -          |  | 0.03           | 0.08 10 <sup>-2</sup> |
| 20:4n-3            | -            |  | -          |  | 0.04           | 0.03 10 <sup>-1</sup> |
| 20:4 n-6           | -            |  | -          |  | 0.15           | 0.09 10 <sup>-1</sup> |
| 20:5 n-3           | 0.66         |  | -          |  | 2.04           | 0.15                  |
| 22:0               | -            |  | -          |  | 0.07           | 0.01 10 <sup>-1</sup> |
| 22:1               | -            |  | -          |  | 0.04           | 0.02 10 <sup>-2</sup> |
| 22:5n-3            | 0.91         |  | -          |  | ND             | ND                    |
| 22:5n-6            | -            |  | -          |  | 0.04           | 0.02 10 <sup>-2</sup> |
| 22:6n-3            | 1.03         |  | -          |  | 0.25           | 0.05 10 <sup>-1</sup> |
| 24:0               | -            |  | -          |  | 0.26           | 0.08 10 <sup>-1</sup> |
| Others             | 1.24         |  | 8.58       |  | 0.09           | 0.00                  |
| Total SFA          | 18.54        |  | 69.06      |  | 2.58           | 0.07                  |
| Total MUFA         | 22.17        |  | 16.92      |  | 1.88           | 0.06                  |
| Total PUFA         | 58.05        |  | 5.44       |  | 3.91           | 0.18                  |
| Total n-3 PUFA     | 8.11         |  | -          |  | 3.11           | 0.12                  |
| Total n-6 PUFA     | 49.94        |  | 5.46       |  | 0.79           | 0.02                  |
| n-6 PUFA/ n-3 PUFA | 0.16         |  | -          |  | 0.25           | 0.01                  |
| Total fatty acids  | 98.76        |  | 91.42      |  | 8.37           | 0.13                  |

CTRL, standard diet; HF, high-fat diet; ND, not detected; Phaeo, freeze-dried of *P. tricornutum*; -, not analysed. Results are represented as mean values  $\pm$  SD,  $n = 3$  for Phaeo biomass. Mean values from CTRL and HF diets ( $n = 2$ ) were similar, no statistical analysis were carried out, no SD mentioned.

**Table S3.** Pigment and sterol composition, antioxidant activity and *in vitro* digestibility of freeze-dried *P. tricornutum*

| <b>Phaeo</b>                                                           |                      |                      |
|------------------------------------------------------------------------|----------------------|----------------------|
| Pigments (g/100g)                                                      | Mean                 | SD                   |
| Total chlorophyll                                                      | 1.49                 | $0.05 \cdot 10^{-1}$ |
| Chlorophyll- <i>a</i>                                                  | 1.16                 | 0.02                 |
| Chlorophyll- <i>c</i>                                                  | 0.33                 | $0.03 \cdot 10^{-1}$ |
| Total carotenoids                                                      | 0.55                 | 0.01                 |
| <b>Carotenoids (g/100g)</b>                                            |                      |                      |
| Fucoxanthin                                                            | 0.31                 | $0.06 \cdot 10^{-1}$ |
| 4k-hex-fucoxanthin                                                     | 0.12                 | 0.04                 |
| Diadinoxanthin                                                         | 0.03                 | $0.02 \cdot 10^{-1}$ |
| Diatoxanthin                                                           | $0.95 \cdot 10^{-2}$ | $0.05 \cdot 10^{-2}$ |
| $\beta$ -carotene                                                      | $0.26 \cdot 10^{-1}$ | $0.05 \cdot 10^{-2}$ |
| Others                                                                 | $0.52 \cdot 10^{-1}$ | $0.03 \cdot 10^{-1}$ |
| <b>Sterols (g/100g)</b>                                                |                      |                      |
| Cholesterol                                                            | $6.50 \cdot 10^{-3}$ |                      |
| Brassicasterol                                                         | $5.94 \cdot 10^{-1}$ |                      |
| 24-Metilcholesterol                                                    | $3.25 \cdot 10^{-3}$ |                      |
| Campesterol                                                            | $2.93 \cdot 10^{-2}$ |                      |
| $\beta$ -sitosterol                                                    | $1.11 \cdot 10^{-2}$ |                      |
| Sitostanol                                                             | $1.05 \cdot 10^{-3}$ |                      |
| Others                                                                 | $4.55 \cdot 10^{-3}$ |                      |
| Total sterols                                                          | 0.65                 |                      |
| <b>Antioxidant activity*</b>                                           |                      |                      |
| Antiradical activity ( $I_{50}$ )†<br>(DPPH in mg biomass/ml extract)‡ | 1.81                 | 0.15                 |
| Antioxydant activity ORAC<br>( $\mu$ mol TE/mg biomass)§               | 106.39               | 6.92                 |
| <i>In vitro</i> digestibility (% dry matter)                           | 52.00                | 2.90                 |

DPPH, 2, 2-diphenyl-1-picrylhydrazyl; ORAC, Oxygen-radical absorbance capacity; Phaeo, freeze-dried of *P. tricornutum*; TE, Trolox equivalent. Results are represented as mean values  $\pm$  SD,  $n = 3$ , excepted for sterol composition ( $n = 1$ ). \* Antioxidant activity was measured from extracts of Phaeo in 90% acetone. †  $I_{50}$ : concentration of the biomass/mL extract decreasing the absorbance of the DPPH solution by 50%. ‡ DPPH is a stable radical that can be reduced by reaction with an antiradical hydrogen-donor compound. § Trolox: water-soluble vitamin E analogue. 1 ORAC unit equals the net protection produced by 1  $\mu$ M Trolox.

**Table S4.** Total fatty acid composition of red blood cells

| Fatty acid (mol %)          | CTRL  |      | HF       |      | HF-Phaeo  |      |
|-----------------------------|-------|------|----------|------|-----------|------|
|                             | Mean  | SD   | Mean     | SD   | Mean      | SD   |
| <b>SFA</b>                  |       |      |          |      |           |      |
| 14:0                        | 0.73  | 0.16 | 1.00     | 0.32 | 1.01      | 0.14 |
| 16:0                        | 37.91 | 1.93 | 27.93*** | 2.62 | 32.72***† | 3.79 |
| 18:0                        | 13.18 | 0.99 | 13.48    | 1.08 | 14.40     | 1.06 |
| Total SFA                   | 51.82 | 1.93 | 42.40**  | 3.93 | 48.13     | 4.93 |
| <b>MUFA</b>                 |       |      |          |      |           |      |
| 16:1                        | 0.98  | 0.12 | 0.97     | 0.12 | 0.96      | 0.17 |
| 18:1(n-7 + n-9)             | 11.38 | 0.79 | 13.31*   | 1.41 | 11.43     | 0.51 |
| 20:1                        | ND    | -    | ND       | -    | ND        | -    |
| 22:1                        | 0.57  | 0.10 | 0.95***  | 0.25 | 0.23***†  | 0.09 |
| 24:1n-9                     | ND    | -    | ND       | -    | ND        | -    |
| Total MUFA                  | 12.93 | 0.86 | 15.22**  | 1.26 | 12.62†    | 0.51 |
| <b>PUFA</b>                 |       |      |          |      |           |      |
| 18:2n-6                     | 6.79  | 0.66 | 7.78     | 0.77 | 6.08†     | 0.95 |
| 20:2n-6                     | 0.31  | 0.05 | 0.82**   | 0.14 | 0.49†     | 0.18 |
| 20:4n-6                     | 10.33 | 0.87 | 15.80*** | 2.24 | 8.87†     | 3.00 |
| n-6 PUFA                    | 17.17 | 1.65 | 24.01*** | 2.38 | 13.95†    | 2.28 |
| 18:3n-3                     | ND    | -    | ND       | -    | ND        | -    |
| 20:5n-3                     | 0.52  | 0.18 | 0.30     | 0.09 | 1.77***†  | 0.42 |
| 22:5n-3                     | 10.68 | 2.09 | 7.11     | 1.73 | 14.32†    | 3.87 |
| 22:6n-3                     | 1.23  | 0.19 | 2.43***  | 0.28 | 1.51†     | 0.51 |
| n-3 PUFA                    | 12.99 | 2.06 | 9.78     | 1.90 | 18.54***† | 3.57 |
| <b>n-6 PUFA/n-3 PUFA</b>    | 1.41  | 0.27 | 2.41**   | 0.36 | 1.12†     | 0.13 |
| <b>Total PUFA</b>           | 30.08 | 2.02 | 32.86    | 3.06 | 32.68     | 5.82 |
| <b>MUFA/SFA</b>             | 0.25  | 0.02 | 0.36***  | 0.02 | 0.26†     | 0.02 |
| <b>Δ9-Desaturase index‡</b> | 0.46  | 0.03 | 0.50     | 0.02 | 0.44†     | 0.01 |

CTRL, standard diet; HF, high-fat diet; HF-Phaeo, high-fat diet supplemented with 12% of *P. tricornutum*; MUFA, mono-unsaturated fatty acids; ND, not detected; PUFA, polyunsaturated fatty acids; SFA, saturated fatty acids. Results are represented as mean values  $\pm$  SD,  $n = 6$ . Mean values were significantly different from those of the CTRL group: \* $p < 0.05$ ; \*\* $p < 0.001$ ; \*\*\* $p < 0.0001$  (one-way ANOVA; LSD post hoc test). † significant difference compared with the HF group ( $p < 0.05$ ). ‡  $\Delta 9$ -Desaturase index =  $[18:1(n-7 + n-9) / 18:0 + 18:1(n-7 + n-9)]$ .

**Table S5.** Fatty acid composition of liver total lipids

| Fatty acid (mol %)          | CTRL  |      | HF       |      | HF-Phaeo  |      |
|-----------------------------|-------|------|----------|------|-----------|------|
|                             | Mean  | SD   | Mean     | SD   | Mean      | SD   |
| <b>SFA</b>                  |       |      |          |      |           |      |
| 14:0                        | 0.31  | 0.08 | 1.80***  | 0.10 | 0.95***†  | 0.11 |
| 16:0                        | 20.85 | 0.98 | 22.23    | 3.06 | 20.40     | 0.89 |
| 18:0                        | 13.52 | 0.73 | 13.00    | 2.37 | 15.48†    | 1.71 |
| Total SFA                   | 34.54 | 0.31 | 37.03    | 4.35 | 36.84     | 1.65 |
| <b>MUFA</b>                 |       |      |          |      |           |      |
| 16:1                        | 2.13  | 0.46 | 2.90     | 0.98 | 1.86†     | 0.51 |
| 18:1(n-7 + n-9)             | 13.18 | 1.65 | 17.77    | 7.15 | 16.08     | 1.27 |
| 20:1n-9                     | ND    | -    | ND       | -    | ND        | -    |
| 22:1                        | 0.44  | 0.09 | 0.26***  | 0.09 | 0.17***   | 0.02 |
| 24:1n-9                     | 0.41  | 0.05 | 3.09***  | 0.26 | 1.29***†  | 0.23 |
| Total MUFA                  | 17.38 | 1.70 | 24.01    | 8.02 | 20.15     | 1.09 |
| <b>PUFA</b>                 |       |      |          |      |           |      |
| 18:2n-6                     | 15.81 | 1.89 | 9.58***  | 1.45 | 9.44***   | 0.82 |
| 20:2n-6                     | 0.47  | 0.18 | 0.59     | 0.46 | 0.22      | 0.06 |
| 20:4n-6                     | 20.83 | 1.58 | 9.35***  | 1.88 | 15.49***† | 1.01 |
| n-6 PUFA                    | 34.09 | 2.21 | 19.52*** | 0.52 | 25.15***† | 1.43 |
| 18:3n-3                     | 0.40  | 0.09 | 0.44     | 0.12 | 0.25*†    | 0.04 |
| 20:5n-3                     | 0.72  | 0.08 | 0.25***  | 0.08 | 1.73***†  | 0.17 |
| 22:5n-3                     | 0.91  | 0.10 | 0.72     | 0.13 | 2.40***†  | 0.21 |
| 22:6n-3                     | 7.09  | 1.23 | 3.58***  | 0.87 | 7.65†     | 0.72 |
| n-3 PUFA                    | 8.00  | 1.22 | 5.10     | 0.77 | 12.41***† | 0.82 |
| <b>n-6 PUFA/n-3 PUFA</b>    | 4.34  | 0.79 | 3.88     | 0.51 | 2.04***†  | 0.25 |
| <b>Total PUFA</b>           | 45.86 | 1.69 | 24.61*** | 1.29 | 37.56***† | 0.74 |
| <b>MUFA/SFA</b>             | 0.51  | 0.06 | 0.67     | 0.29 | 0.53      | 0.04 |
| <b>Δ9-Desaturase index‡</b> | 0.49  | 0.04 | 0.56     | 0.14 | 0.51      | 0.02 |

CTRL, standard diet; HF, high-fat diet; HF-Phaeo, high-fat diet supplemented with 12% of *P. tricornutum*; MUFA, mono-unsaturated fatty acids; ND, not detected; PUFA, polyunsaturated fatty acids; SFA, saturated fatty acids. Results are represented as mean values ± SD,  $n = 6$ . Mean values were significantly different from those of the CTRL group: \* $p < 0.05$ ; \*\* $p < 0.001$ ; \*\*\*  $p < 0.0001$  (one-way ANOVA; LSD post hoc test). † significant difference compared with the HF group ( $p < 0.05$ ). ‡ Δ9-Desaturase index = [18:1(n-7 + n-9)/ 18:0 + 18:1(n-7 + n-9)].

**Table S6.** Fatty acid composition of liver neutral lipids

| Fatty acid (mol %)          | CTRL  |      | HF       |      | HF-Phaeo  |      |
|-----------------------------|-------|------|----------|------|-----------|------|
|                             | Mean  | SD   | Mean     | SD   | Mean      | SD   |
| <b>SFA</b>                  |       |      |          |      |           |      |
| 14:0                        | 0.66  | 0.15 | 2.17***  | 0.30 | 1.79***†  | 0.18 |
| 16:0                        | 23.57 | 1.55 | 26.92*   | 1.93 | 24.86     | 2.34 |
| 18:0                        | 1.67  | 0.67 | 4.83**   | 0.58 | 2.76†     | 0.64 |
| Total SFA                   | 25.25 | 1.94 | 35.11**  | 2.94 | 30.58***† | 2.15 |
| <b>MUFA</b>                 |       |      |          |      |           |      |
| 16:1                        | 4.30  | 0.79 | 4.31     | 0.41 | 3.40      | 0.67 |
| 18:1(n-7 + n-9)             | 25.25 | 2.56 | 36.24*** | 3.31 | 27.85†    | 3.76 |
| 20:1n-9                     | 0.30  | 0.13 | 0.44     | 0.17 | 0.11†     | 0.01 |
| 22:1                        | 0.25  | 0.05 | 0.13**   | 0.03 | 0.16**    | 0.01 |
| 24:1n-9                     | 2.00  | 0.84 | 1.47     | 0.66 | 4.89***†  | 1.25 |
| Total MUFA                  | 31.82 | 1.64 | 42.70**  | 3.73 | 38.05**   | 1.19 |
| <b>PUFA</b>                 |       |      |          |      |           |      |
| 18:2n-6                     | 23.78 | 2.49 | 8.84***  | 1.25 | 9.05***   | 0.62 |
| 20:2n-6                     | 0.35  | 0.10 | 0.25     | 0.08 | 0.17**    | 0.03 |
| 20:4n-6                     | 5.49  | 1.16 | 3.01**   | 1.40 | 1.61**    | 0.21 |
| n-6 PUFA                    | 29.62 | 2.74 | 11.30*** | 1.53 | 10.74***  | 0.43 |
| 18:3n-3                     | 1.05  | 0.16 | 0.45***  | 0.13 | 0.53***   | 0.09 |
| 20:5n-3                     | 0.72  | 0.08 | 0.25***  | 0.08 | 1.73***†  | 0.17 |
| 22:5n-3                     | 0.85  | 0.24 | 0.44***  | 0.11 | 2.32***†  | 0.35 |
| 22:6n-3                     | 3.02  | 0.34 | 0.90***  | 0.19 | 3.02†     | 0.68 |
| n-3 PUFA                    | 5.64  | 0.36 | 2.08***  | 0.39 | 10.74***† | 0.89 |
| <b>n-6 PUFA/n-3 PUFA</b>    | 5.26  | 0.41 | 5.10     | 0.41 | 1.68***†  | 0.18 |
| <b>Total PUFA</b>           | 35.25 | 2.95 | 12.49*** | 1.23 | 16.59***† | 2.32 |
| <b>MUFA/SFA</b>             | 1.12  | 0.27 | 1.16     | 0.14 | 1.25      | 0.08 |
| <b>Δ9-Desaturase index‡</b> | 0.92  | 0.03 | 0.86*    | 0.04 | 0.92†     | 0.02 |

CTRL, standard diet; HF, high-fat diet; HF-Phaeo, high-fat diet supplemented with 12% of *P. tricornutum*; MUFA, mono-unsaturated fatty acids; PUFA, polyunsaturated fatty acids; SFA, saturated fatty acids; . Results are represented as mean values ± SD,  $n = 6$ . Mean values were significantly different from those of the CTRL group: \* $p < 0.05$ ; \*\* $p < 0.001$ ; \*\*\* $p < 0.0001$  (one-way ANOVA; LSD post hoc test). † significant difference compared with the HF group ( $p < 0.05$ ). ‡ Δ9-Desaturase index = [18:1(n-7 + n-9)/ 18:0 + 18:1(n-7 + n-9)].

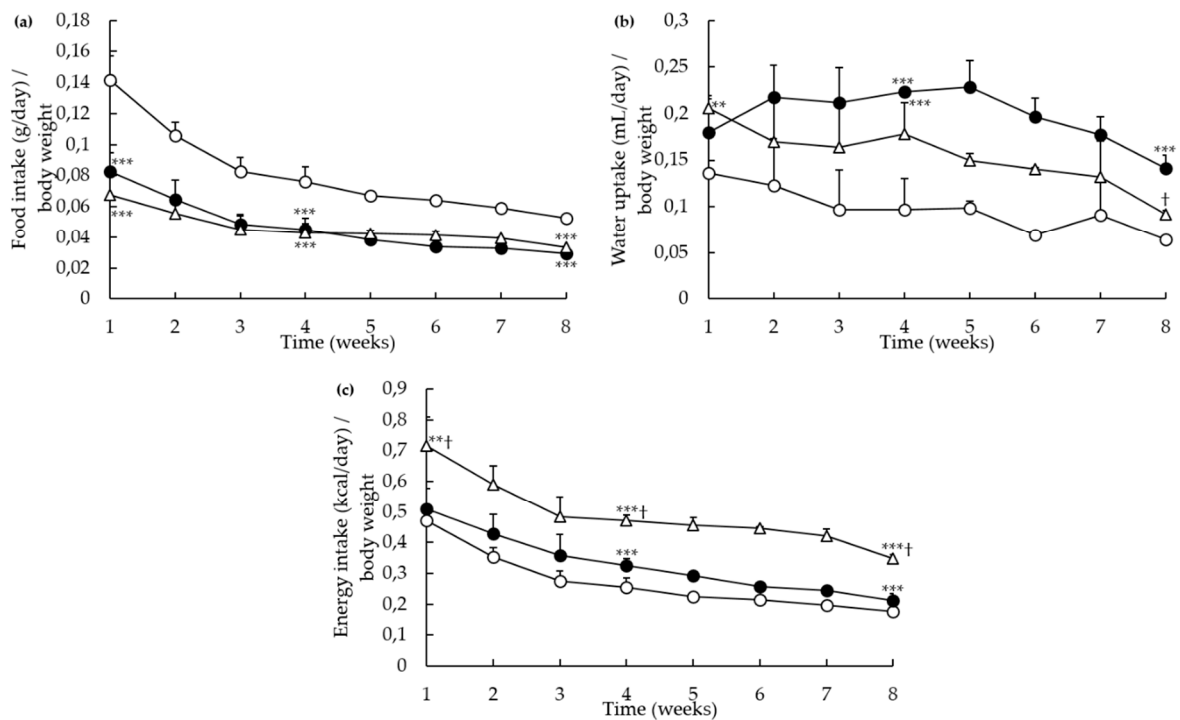

**Figure S1.** Comparison of daily food intake (a), water intake (b), energy intake (c) between the different groups. CTRL (○), control group; HF (●), high fat group; HF-Phaeo (△), high fat group supplemented with *P. tricornutum*. Values are means ( $n = 6$ ), with standard deviations represented by vertical bars. Mean values were significantly different from those of the CTRL group: \* $p < 0.05$ ; \*\* $p < 0.001$ ; \*\*\* $p < 0.0001$  (one-way ANOVA; LSD post hoc test). † significant difference compared with the HF group ( $p < 0.05$ ).
